# Supplementary material
Source: PubMed Central journal article supplement (PMC3767971)
Supplement: NIHMS506883-supplement-1_si_001.pdf [file NIHMS506883-supplement-1_si_001.pdf]

Supporting Information to

**Tuning Chemical and Physical Crosslinks in Silk Electrodes  
for Morphological Analysis and Mechanical Reinforcement**

Yinan Lin <sup>□</sup>, Xiaoxia Xia <sup>□</sup>, Ke Shang <sup>□</sup>, Roberto Elia <sup>□</sup>,  
Wenwen Huang <sup>□</sup>, Peggy Cebe <sup>□</sup>, Gary Leisk<sup>@</sup>, Fiorenzo G. Omenetto <sup>□</sup>, David L. Kaplan\*<sup>□</sup>

<sup>□</sup> Department of Biomedical Engineering, Tufts University, 4 Colby Street, Medford,  
Massachusetts 02155, United States

<sup>@</sup> Department of Mechanical Engineering, Tufts University, Medford, Massachusetts 02155,  
United States

<sup>□</sup> Department of Physics, Tufts University, 4 Colby Street, Medford, Massachusetts 02155,  
United States

\* Corresponding Author. Email: david.kaplan@tufts.edu

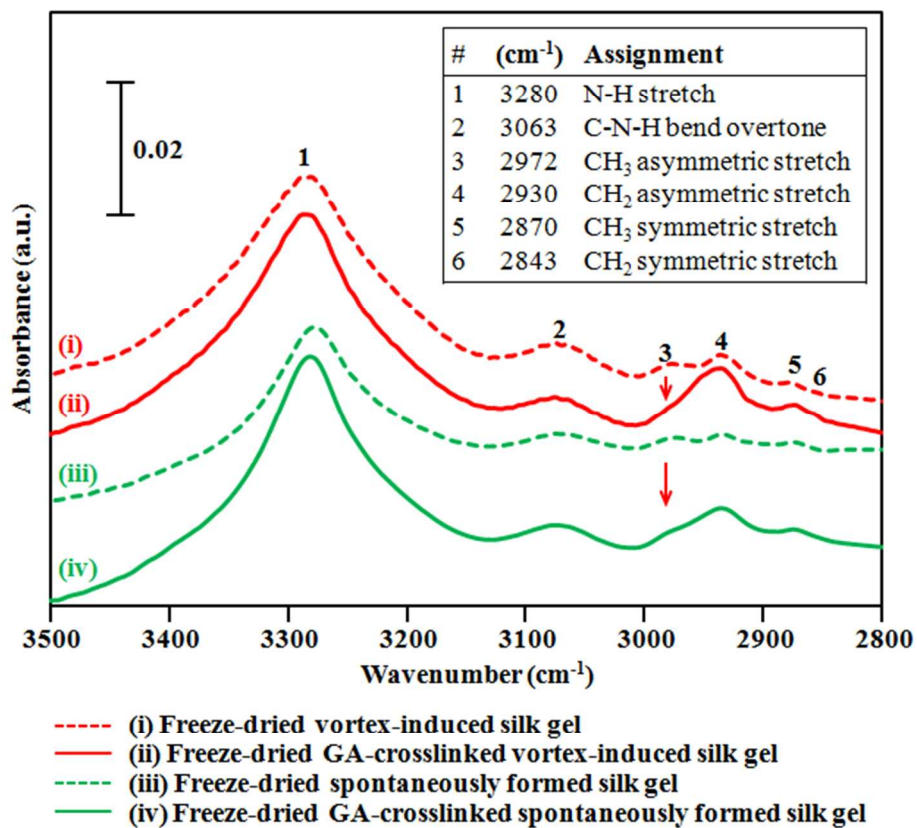

**Figure S1.** FTIR spectra (in the 3500 ~ 2800 cm<sup>-1</sup> range) of (top to bottom): the freeze-dried vortex-induced silk gel, the freeze-dried glutaraldehyde-crosslinked vortex-induced silk gel, the freeze-dried spontaneously formed silk gel, and the freeze-dried glutaraldehyde-crosslinked spontaneously formed silk gel. The principle IR bands and their assignments [S1] were summarized in the inset. The chemically crosslinked silk gels exhibit a decrease in the intensity of the 2972 cm<sup>-1</sup> CH<sub>3</sub> asymmetric stretching vibration band (as pointed out by the arrow) suggesting the involvement of the side chain methyl groups in the crosslinking. Similar result was obtained on the electrogelled silk, as shown in Figure 3).

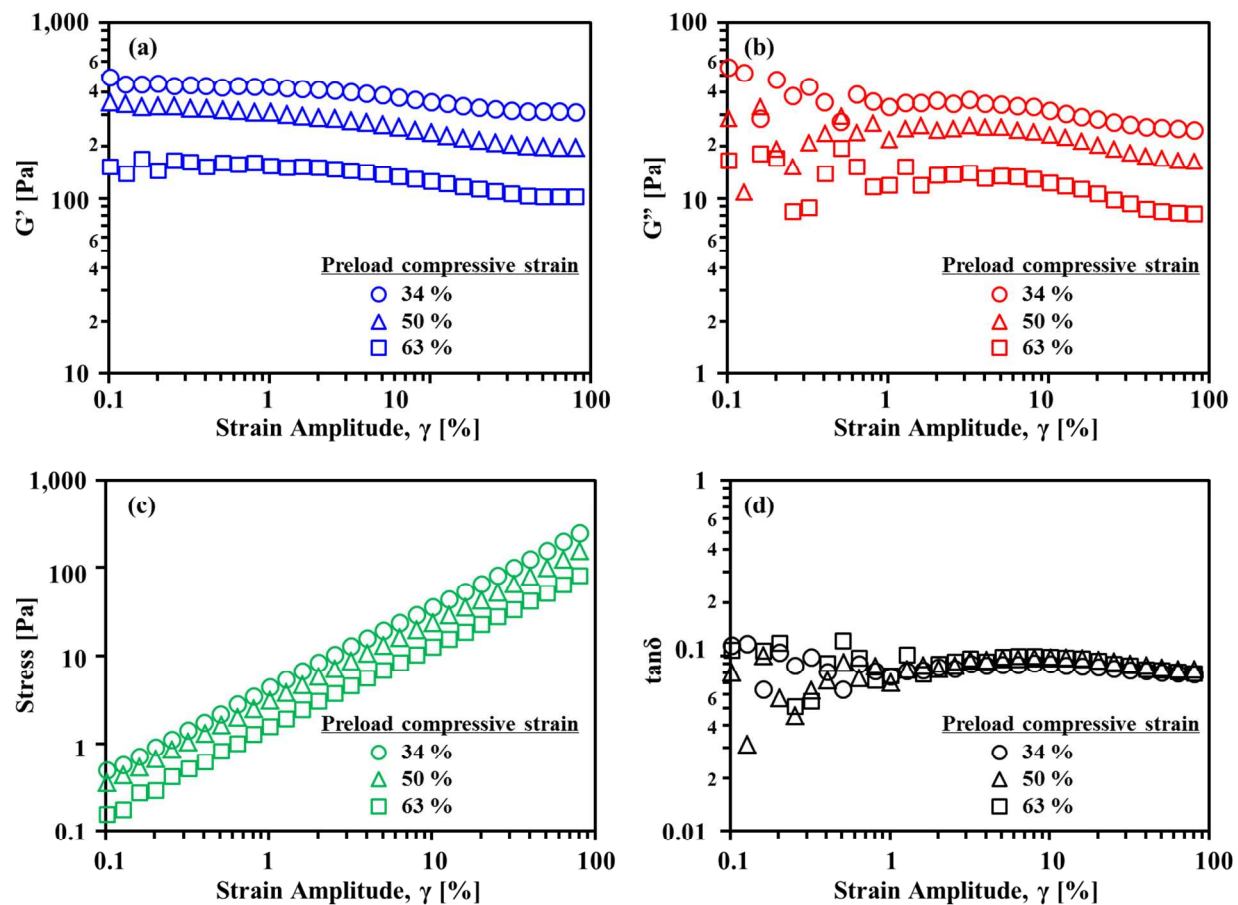

**Figure S2.** Linear rheology of glutaraldehyde-crosslinked silk *e*-gel under various levels of compressive pre-strain up to 63 %. The strain dependence of (a) the dynamic elastic modulus,  $G'$ , (b) the dynamic loss modulus,  $G''$ , (c) the dynamic stress and (d) the loss tangent,  $\tan\delta = G''/G'$ , was measured as the amplitude of strain increased from 0.1 ~ 100 % at a fixed frequency of 1 rad/sec.

## References

S1. Hu, X.; Kaplan, D.; Cebe, P. *Macromolecules* **2006**, *39*, 6161-6170.
